# Supplementary material for: Integrating Stakeholder Engagement With Claims-Based Research on Health Insurance Design and Bipolar Disorder
Source: Atypon-hosted journal article supplement (doi:10.1176/appi.ps.202000177), 2020-11-10
Supplement: appi.ps.202000177.ds001.pdf [file appi.ps.202000177.ds001.pdf]

**Major components of stakeholder engagement in the research project**

Stakeholder engagement components and groups

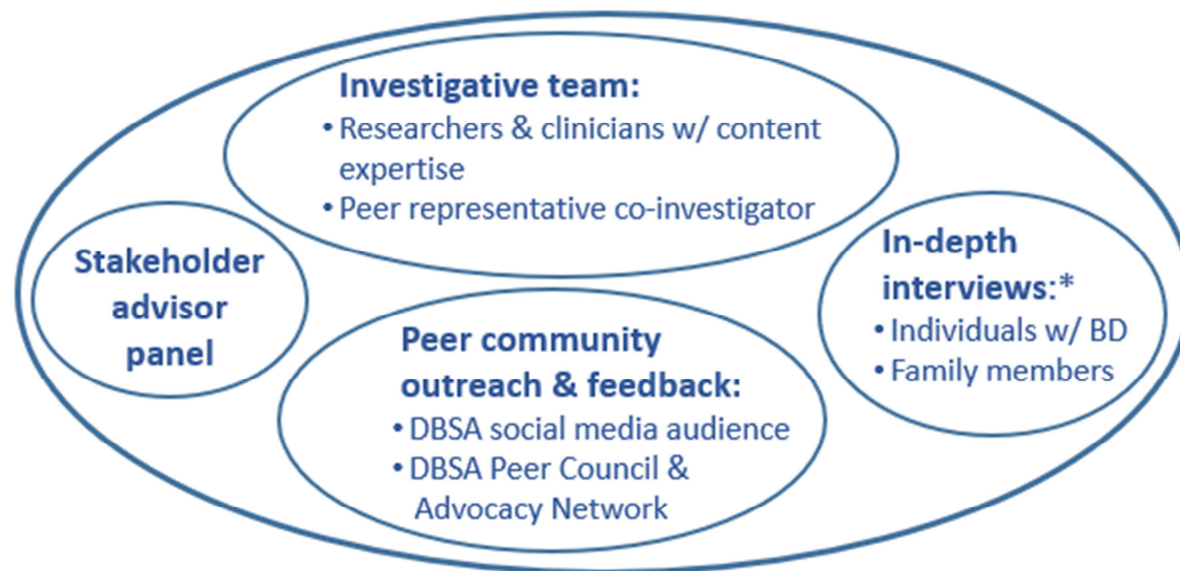

*Information & queries about project activities, progress, & results*

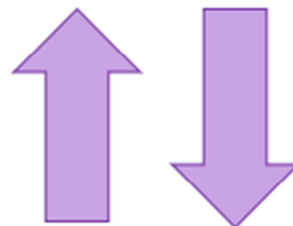

*Real-world experiences, insights, interpretation, explanation, & advice*

Major project activities

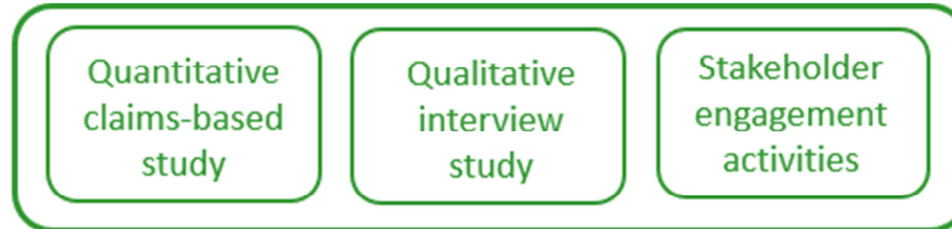

\* Qualitative interview study participants were not technically part of our stakeholder engagement; interview respondents were not given project updates and did not provide broader advice on our project, unless separately through our outreach and feedback activities. However, their stories provided essential stakeholder perspectives, with impacts on all major project activities
